# Supplementary material
Source: PubMed Central journal article supplement (PMC100304)
Supplement: nar_30_3_719__1.pdf [file nar_30_3_719__1.pdf]

## SUPPLEMENTARY MATERIAL

**Table S1.** Sugar-phosphate torsion angles, glycosidic angles (°) and furanose conformations<sup>a</sup>

|                    | $\alpha$<br>P-O5' | $\beta$<br>O5'-C5'                        | $\gamma$<br>C5'-C4' | $\delta$<br>C4'-C3'                       | $\epsilon$<br>C3'-O3'                       | $\zeta$<br>O3'-P                          | $\chi$<br>C1'-N                                                       | $P$ | $\tau_m$ | Pucker   |
|--------------------|-------------------|-------------------------------------------|---------------------|-------------------------------------------|---------------------------------------------|-------------------------------------------|-----------------------------------------------------------------------|-----|----------|----------|
| C1                 |                   |                                           | 77                  | 84                                        | -157                                        | -74                                       | -134                                                                  | 16  | 29       | C3'-endo |
| G2                 | -178              | 177                                       | -170                | 143                                       | -178                                        | -84                                       | -111                                                                  | 203 | 32       | C3'-exo  |
| T3                 | -71               | -165                                      | 40                  | 150                                       | -136                                        | -174                                      | -81                                                                   | 179 | 42       | C2'-endo |
| A4                 | -59               | 151                                       | 48                  | 140                                       | 178                                         | -88                                       | -94                                                                   | 188 | 29       | C3'-exo  |
| C5                 | -79               | 176                                       | 59                  | 135                                       | -145                                        | -154                                      | -92                                                                   | 156 | 40       | C2'-endo |
| G6                 | 67                | 163                                       | -71                 | 149                                       |                                             |                                           | -65                                                                   | 201 | 33       | C3'-exo  |
| B-DNA <sup>b</sup> | -62               | B <sub>I</sub> 176<br>B <sub>II</sub> 146 | 48                  | B <sub>I</sub> 128<br>B <sub>II</sub> 144 | B <sub>I</sub> -176<br>B <sub>II</sub> -114 | B <sub>I</sub> -95<br>B <sub>II</sub> 174 | B <sub>I</sub> R -102<br>B <sub>I</sub> Y -119<br>B <sub>II</sub> -89 | 160 | 35       | C2'-endo |

<sup>a</sup>All parameters were calculated using the Curves 5.2 program (19).<sup>b</sup>Average values for B-DNA taken from Schneider *et al.* (22).  $P$  is the pseudorotation phase angle,  $\tau_m$  is the pseudorotation amplitude, B<sub>I</sub> and B<sub>II</sub> are different phosphate conformations.**Table S2.** Geometrical properties of base pair steps and base pairs<sup>a</sup>

| Base pair          | Step | Shift (Å) | Slide (Å) | Rise (Å) | Tilt (°) | Roll (°) | Twist (°) | Propeller twist (°) | Buckle (°) |
|--------------------|------|-----------|-----------|----------|----------|----------|-----------|---------------------|------------|
| C1-G6              |      |           |           |          |          |          |           | -12                 | 3.0        |
|                    | 1    | 0.2       | 0.1       | 7.1      | -2.2     | 4.0      | 26        |                     |            |
| G2-C5              |      |           |           |          |          |          |           | -2                  | -7.5       |
|                    | 2    | -0.6      | -0.7      | 3.2      | -0.1     | 3.8      | 28        |                     |            |
| T3-A4              |      |           |           |          |          |          |           | -11                 | 2.6        |
|                    | 3    | 0.0       | 0.7       | 3.3      | 0.0      | -4.2     | 47        |                     |            |
| A4-T3              |      |           |           |          |          |          |           |                     |            |
| B-DNA <sup>b</sup> |      | 0         | 0         | 3.4      | 2        | 1        | 36        | -11                 |            |

<sup>a</sup>All parameters were calculated using the Curves 5.2 program (19).<sup>b</sup>Average values for B-DNA taken from Neidle (21).
